# Supplementary material for: Electrolyte-assisted low-voltage decomposition of Li2C2O4 for efficient cathode pre-lithiation in lithium-ion batteries
Source: Royal Society of Chemistry journal article supplement (doi:10.1039/d3cc04442d), 2023-01-01
Supplement: d3cc04442d1.pdf [file d3cc04442d1.pdf]

## Supporting Information

### Electrolyte-assisted low-voltage decomposition of $\text{Li}_2\text{C}_2\text{O}_4$ for efficient cathode pre-lithiation in lithium-ion batteries

#### Experimental Section:

##### Synthesis of re- $\text{Li}_2\text{C}_2\text{O}_4$ :

3.0g of commercial lithium oxalate ( $\text{Li}_2\text{C}_2\text{O}_4$ , Macklin,  $\geq 98.0\%$ ) was added in 150 mL deionized water. After slowly stirring for 30 min with ultrasound, the mixture was slowly poured into 150 mL anhydrous ethanol (99.5%) and the white power was obtained by filtration and vacuum drying.

##### Preparation of commercial $\text{Li}_2\text{C}_2\text{O}_4$ and re- $\text{Li}_2\text{C}_2\text{O}_4$ electrodes

Commercial  $\text{Li}_2\text{C}_2\text{O}_4$  (or re- $\text{Li}_2\text{C}_2\text{O}_4$ ), SP (super p carbon) and PVDF (polyvinylidene fluoride) were mixed in NMP with the mass ratio of 6: 3: 1. Then the slurry was casted onto the aluminum foil and dried at  $120^\circ\text{C}$  for 10 h under vacuum. The electrodes were cut to  $\Phi 14$  mm sheets and pressed at the pressure of 10 MPa. The  $\text{Li}_2\text{C}_2\text{O}_4$  loading in electrodes was  $0.3\sim 0.45\text{mg cm}^{-2}$ .

##### Preparation of cathode and anode electrodes

For NCM electrode, the electrode composites of 80 wt.% NCM, 10 wt.% SP and 10 wt.% PVDF. For NCM(re- $\text{Li}_2\text{C}_2\text{O}_4$ ) electrode, the electrode composites of 76 wt.% NCM, 4 wt.% re- $\text{Li}_2\text{C}_2\text{O}_4$ , 10 wt.% SP and 10 wt.% PVDF. For anode electrode, the mass ratio of silicon-graphite, CMC-SBR and SP is 80:10:10.

All the electrode was made in the laboratory environment.

##### Electrochemical measurements

The CR2025 coin-type cells were assembled in a glove box under Ar atmosphere with celgard-2500 film as the separator and Li foil as the counter electrode. The baseline electrolyte was 1 M  $\text{LiPF}_6$  dissolved in a mixture of ethylene carbonate (EC)/diethyl dimethyl carbonate (DMC) (3/7 in volume ratio). The NO electrolyte was prepared by

adding 0.06M NaNO<sub>2</sub> to the baseline electrolyte. The Neware Battery Testing System (BST-5V20mA, China) was used to test the electrochemical performance for all cells and the test temperature was 28°C. The N/P ratio of full cells was controlled at 1.02-1.2. A CHI720 electrochemical workstation was used for the cyclic voltammetry (CV) measurement. The CV measurements for Si-G||Li half-cells in different electrolytes were measured on at a scan rate of 0.2 mV s<sup>-1</sup> from 0.01 ~ 2.5 V.

For both NCM||Li half-cells, NCM(re-Li<sub>2</sub>C<sub>2</sub>O<sub>4</sub>)||Li half-cells and full-cells, the initial cycle is 0.05 C and the following two cycles is 0.1 C, where 1 C=200 mA g<sup>-1</sup>. After activation process, the current for following cycles is 0.5 C.

As for Si-G anode, the charge/discharge procedure for the initial 3 cycles is 0.1 C and 0.2 C for the following cycles in Si-G||Li half-cells (1 C=1000 mA g<sup>-1</sup>).

### **Physical characterization**

Scanning electron microscopy (SEM, Carl Zeiss MERLIN Compact, 10-20 kV) was performed to analyze the morphology and particle size of the materials and electrodes. X-ray diffraction (XRD) patterns were collected by a BPUKER/D2PHASER X-ray diffractometer (Germany) with Cu K $\alpha$  radiation ( $\lambda$  = 0.15406 nm). The X-ray photoelectron spectroscopy (XPS) was conducted for electrodes using a TESCALAB 250Xi instrument. The decomposition product of Li<sub>2</sub>C<sub>2</sub>O<sub>4</sub> were collected by Raman spectrometer (Renishaw) and Bruker Vertex 70 FT-IR spectrometer (Germany).

### **DFT computation**

The Gaussian 09 software were used for DFT computation. In this article, the hybrid B3LYP functional <sup>1</sup> with 6-311G++ basis set <sup>2,3</sup> was used to optimize and calculate The LUMO and HOMO orbital energy levels.

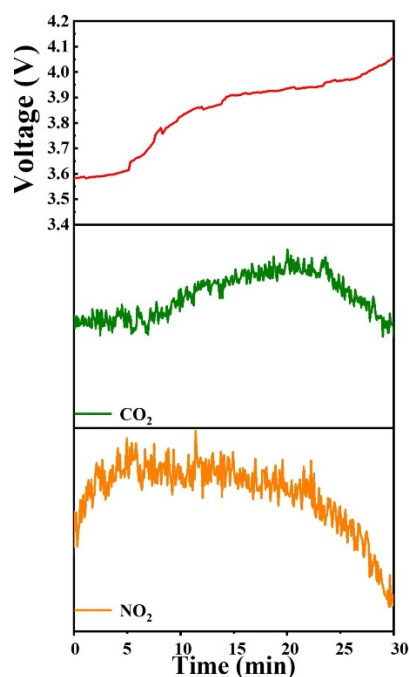

**Figure S1 Voltage profile of commercial  $\text{Li}_2\text{C}_2\text{O}_4$  and in-situ gaseous evolution manners of  $\text{NO}_2$  and  $\text{CO}_2$  measured by DEMS as a function of time for commercial  $\text{Li}_2\text{C}_2\text{O}_4$  in NO electrolyte.**

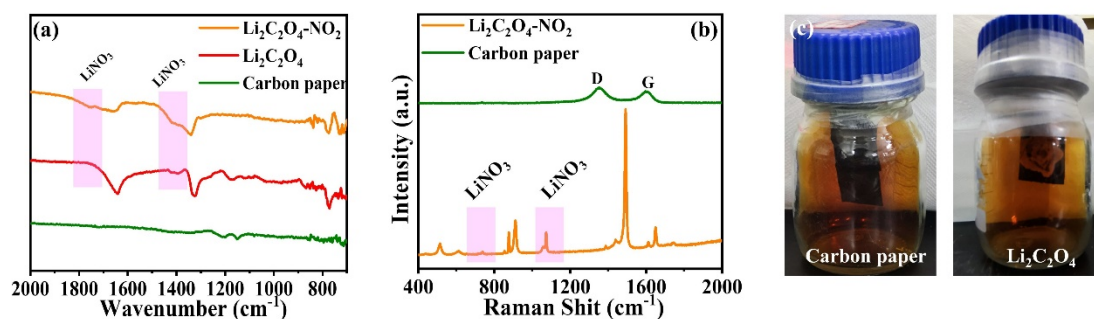

**Figure S2 The reaction products between commercial  $\text{Li}_2\text{C}_2\text{O}_4$  and  $\text{NO}_2$ . (a) FTIR spectra and (b) Raman spectra. (c) experimental equipment for the reaction between commercial  $\text{Li}_2\text{C}_2\text{O}_4$  and  $\text{NO}_2$ .**

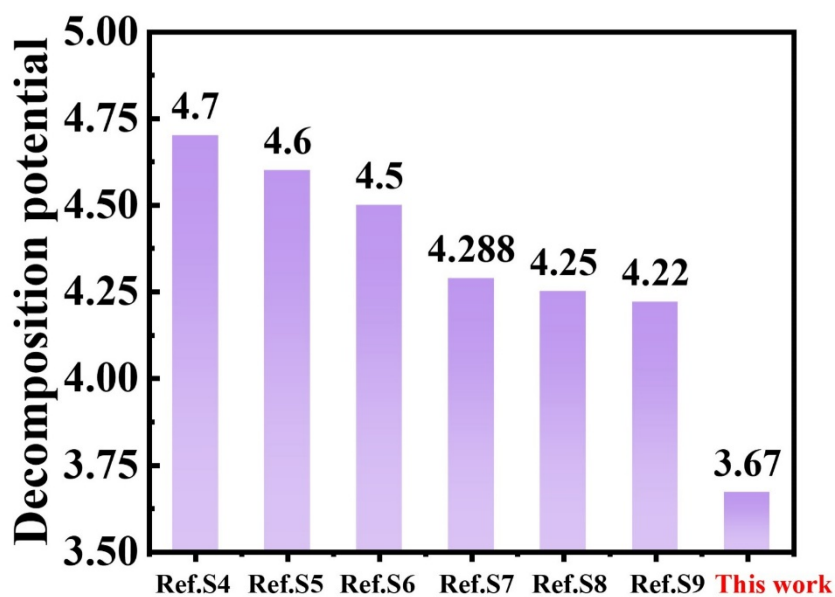

Figure S3 Comparison of the decomposition potential of  $\text{Li}_2\text{C}_2\text{O}_4$  in reported articles<sup>4-9</sup>.

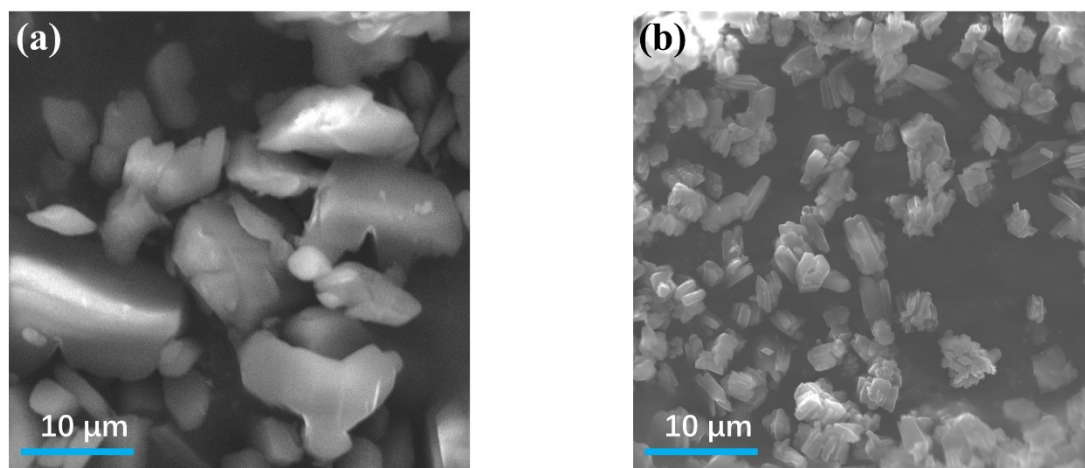

Figure S4 SEM images (a) commercial  $\text{Li}_2\text{C}_2\text{O}_4$ . (b) re- $\text{Li}_2\text{C}_2\text{O}_4$ .

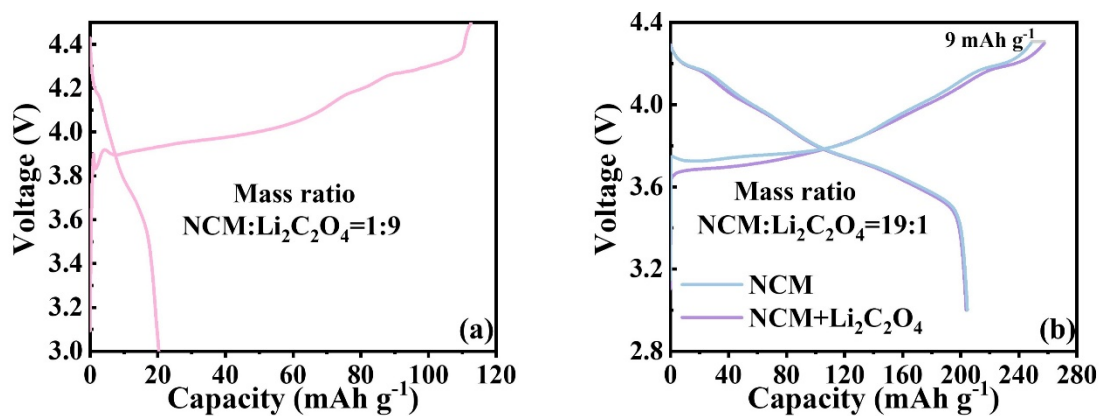

Figure S5 the 1st cycle voltage profile of different electrode in baseline electrolyte

with the mass ratio of NCM and  $\text{Li}_2\text{C}_2\text{O}_4$  of (a) 1:9 and (b) 19:1

#### Note

The initial charge capacity in (a) is  $112.5 \text{ mA g}^{-1}$ , which is 5 times larger than the initial discharge capacity ( $20.3 \text{ mA g}^{-1}$ ). The extra charge capacity could be ascribed to the decomposition of  $\text{Li}_2\text{C}_2\text{O}_4$ . Assuming that the charge capacity provided by NCM is  $25 \text{ mA g}^{-1}$ , the decomposition percentage of re- $\text{Li}_2\text{C}_2\text{O}_4$  is 16.7%. And for (b), according to the theoretical compensation capacity provided by  $\text{Li}_2\text{C}_2\text{O}_4$  is  $27.6 \text{ mAh g}^{-1}$  (while the weight ratio of NCM and  $\text{Li}_2\text{C}_2\text{O}_4$  is 76 wt.% and 4wt.% in cathode electrode), the decomposition percentage of re- $\text{Li}_2\text{C}_2\text{O}_4$  is 32.5%.

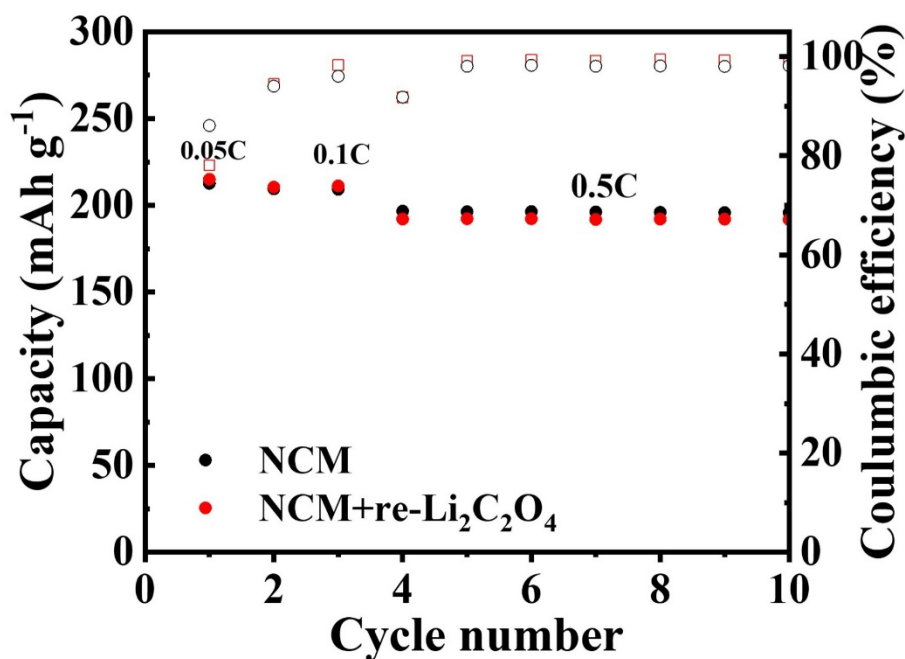

Figure S6 Electrochemical cycling performance of different electrode using NO electrolyte in half-cell. (1 C =  $200 \text{ mA g}^{-1}$ )

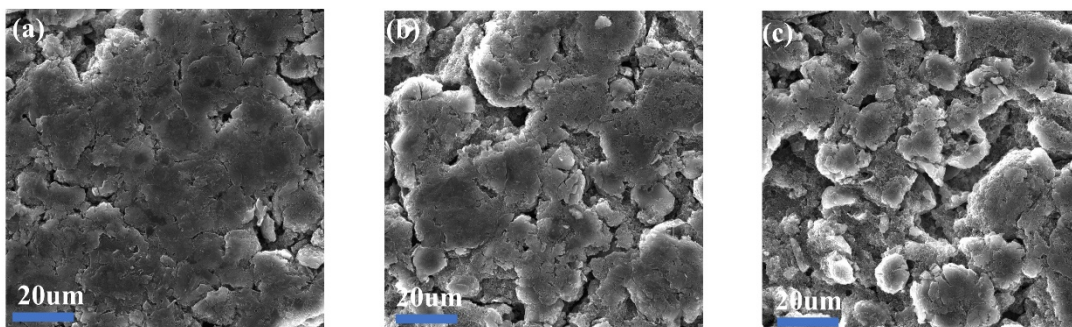

**Figure S7** SEM images of Si-G (a) Pristine. (b) cycled in NO electrolyte. (c) cycled in baseline electrolyte.

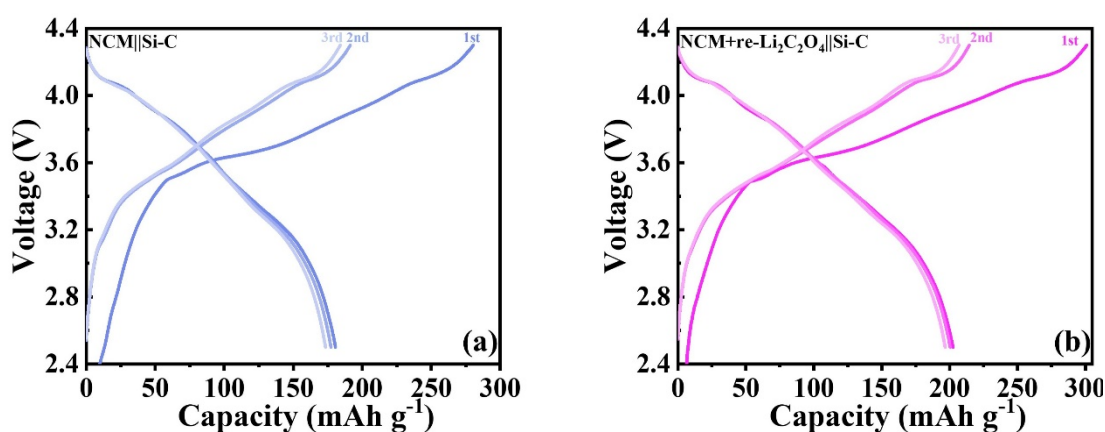

**Figure S8** Initial three cycles of full cells. (a) NCM||Si-G, and (b) NCM(re- $\text{Li}_2\text{C}_2\text{O}_4$ )||Si-G. The charge/discharge procedure for the initial 3 cycles is 0.05 C for the 1st cycle and 0.1 C for the following two cycles, where 1 C=200 mA  $\text{g}^{-1}$ .

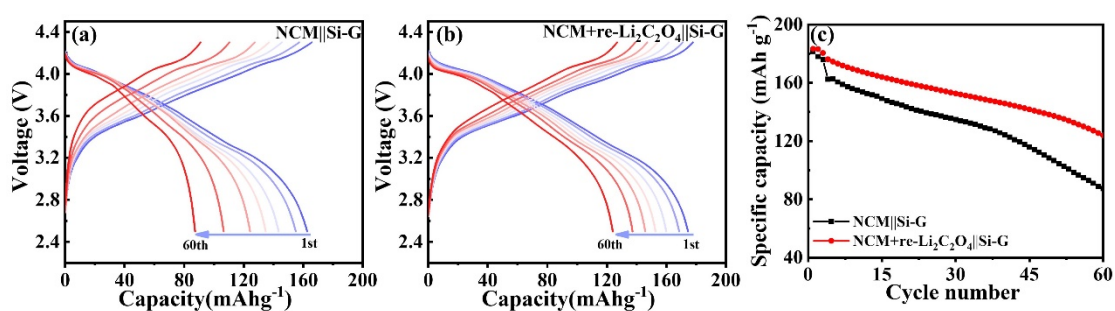

**Figure S9** Electrochemical cycling performance of different electrodes using baseline electrolyte in full cells. Charge and discharge curves of the full cells. (a) NCM||Si-G and (b) NCM (re- $\text{Li}_2\text{C}_2\text{O}_4$ )||Si-G. (c) The specific capacity of the NCM (re-  $\text{Li}_2\text{C}_2\text{O}_4$ )||Si-G and NCM||Si-G full-cells.

**Table S1. Comparison of the Electrochemical properties between our work and different pre-lithiation methods.**

| Cathode                                                                                    | Prelithiation additive                                                                  | Addition amount (wt%) | Charge Cut-off voltage (V) | Increased 1st charge capacity (mAh g <sup>-1</sup> ) | Residue                                                    | Ref              |
|--------------------------------------------------------------------------------------------|-----------------------------------------------------------------------------------------|-----------------------|----------------------------|------------------------------------------------------|------------------------------------------------------------|------------------|
| <b>LiNi<sub>0.83</sub>Co<sub>0.07</sub>Mn<sub>0.1</sub>O<sub>2</sub></b>                   | <b>Li<sub>2</sub>C<sub>2</sub>O<sub>4</sub></b>                                         | <b>4</b>              | <b>4.3</b>                 | <b>28.4</b>                                          | <b>No left</b>                                             | <b>This work</b> |
| LiCoO <sub>2</sub>                                                                         | 0.55Li <sub>2</sub> O:<br>0.45Li <sub>2/3-</sub><br>xMn <sub>1/3</sub> O <sub>5/6</sub> | 2                     | 4.5                        | 17.3                                                 | Unreacted<br>Li <sub>2</sub> O                             | 10               |
| LiNi <sub>0.6</sub> Co <sub>0.2</sub> Mn <sub>0.2</sub> O <sub>2</sub>                     | Li <sub>2</sub> C <sub>4</sub> O <sub>4</sub>                                           | 2.5<br>5<br>10        | 4.5                        | 2.7<br>18.1<br>32.7                                  | Unreacted<br>Li <sub>2</sub> C <sub>2</sub> O <sub>4</sub> | 11               |
| LiNi <sub>0.8</sub> Co <sub>0.1</sub> Mn <sub>0.1</sub> O <sub>2</sub>                     | Fe/LiF/Li <sub>2</sub> O                                                                | 4.8                   | 4.4                        | 31                                                   | Fe <sub>3</sub> O <sub>4</sub> &<br>unreacted<br>additives | 12               |
| LiCoO <sub>2</sub>                                                                         | Mo <sub>2</sub> C/nano-<br>Li <sub>2</sub> C <sub>2</sub> O <sub>4</sub>                | 10                    | 4.4                        | 52                                                   | Mo <sub>2</sub> C                                          | 9                |
| LiNi <sub>0.33</sub> Co <sub>0.33</sub> Mn <sub>0.33</sub> O <sub>2</sub>                  | Li <sub>2</sub> O <sub>2</sub>                                                          | 2                     | 4.6                        | 28                                                   | 1%NCM &<br>impurities                                      | 13               |
| LiCoO <sub>2</sub>                                                                         | Li <sub>3</sub> N                                                                       | 2.5                   | 4.5                        | 51                                                   | Unreacted<br>Li <sub>3</sub> N                             | 14               |
| Li <sub>1.15</sub> Ni <sub>0.17</sub> Co <sub>0.11</sub> Mn <sub>0.57</sub> O <sub>2</sub> | Li <sub>2</sub> O                                                                       | 3<br>6<br>9           | 4.8                        | 8.2<br>24.6<br>5.3                                   | Unreacted<br>Li <sub>2</sub> O                             | 15               |
| LiNi <sub>0.5</sub> Mn <sub>1.5</sub> O <sub>4</sub>                                       | Li <sub>2</sub> C <sub>2</sub> O <sub>4</sub>                                           | 2.5<br>5              | 4.7                        | 15<br>29                                             | Unreacted<br>Li <sub>2</sub> C <sub>2</sub> O <sub>4</sub> | 5                |
| LiCoO <sub>2</sub>                                                                         | Li <sub>5</sub> FeO <sub>4</sub>                                                        | 7                     | 4.3                        | 68                                                   | LiFeO <sub>2</sub>                                         | 16               |
| LiFePO <sub>4</sub>                                                                        | NiO/Li <sub>2</sub> C <sub>2</sub> O <sub>4</sub>                                       | 20                    | 4.5                        | 107                                                  | NiO                                                        | 7                |

## References

- 1 A. D. Becke, *The Journal of Chemical Physics*, 1993, **98**, 5648–5652.
- 2 R. Krishnan, J. S. Binkley, R. Seeger and J. A. Pople, *The Journal of Chemical Physics*, 1980, **72**, 650–654.
- 3 M. J. Frisch, J. A. Pople and J. S. Binkley, *The Journal of Chemical Physics*, 1984, **80**, 3265–3269.
- 4 C.-J. Huang, Y.-C. Hsu, K. N. Shitaw, Y.-J. Siao, S.-H. Wu, C.-H. Wang, W.-N. Su and B. J. Hwang, *ACS Appl. Mater. Interfaces*, 2022, **14**, 26724–26732.
- 5 S. Solchenbach, M. Wetjen, D. Pritzl, K. U. Schwenke and H. A. Gasteiger, *J. Electrochem. Soc.*, 2018, **165**, A512–A524.
- 6 D. Shanmukaraj, S. Grugeon, S. Laruelle, G. Douglade, J.-M. Tarascon and M.

- Armand, *Electrochemistry Communications*, 2010, **12**, 1344–1347.
- 7 G. Huang, J. Liang, X. Zhong, H. Liang, C. Cui, C. Zeng, S. Wang, M. Liao, Y. Shen, T. Zhai, Y. Ma and H. Li, *Nano Res.*, 2023, **16**, 3872–3878.
  - 8 M. Fan, Q. Meng, X. Chang, C. Gu, X. Meng, Y. Yin, H. Li, L. Wan and Y. Guo, *Advanced Energy Materials*, 2022, **12**, 2103630.
  - 9 W. Zhong, C. Zhang, S. Li, W. Zhang, Z. Zeng, S. Cheng and J. Xie, *Sci. Sci. China Mater.*, 2023, **66**, 903–912.
  - 10 M. Diaz-Lopez, P. A. Chater, P. Bordet, M. Freire, C. Jordy, O. I. Lebedev and V. Pralong, *Adv. Energy Mater.*, 2020, **10**, 1902788.
  - 11 A. Gomez-Martin, M. M. Gnutzmann, E. Adhitama, L. Frankenstein, B. Heidrich, M. Winter and T. Placke, *Advanced Science*, 2022, **9**, 2201742.
  - 12 J. Du, W. Wang, A. Y. Sheng Eng, X. Liu, M. Wan, Z. W. Seh and Y. Sun, *Nano Lett.*, 2020, **20**, 546–552.
  - 13 Y. Bie, J. Yang, J. Wang, J. Zhou and Y. Nuli, *Chem. Commun.*, 2017, **53**, 8324–8327.
  - 14 Y. Sun, Y. Li, J. Sun, Y. Li, A. Pei and Y. Cui, *Energy Storage Materials*, 2017, **6**, 119–124.
  - 15 X. Hou, Y. Yang, Y. Mao, J. Song, J. Yang, G. Li, Y. Pan, Y. Wang and J. Xie, *J. Electrochem. Soc.*, 2019, **166**, A3387–A3390.
  - 16 X. Su, C. Lin, X. Wang, V. A. Maroni, Y. Ren, C. S. Johnson and W. Lu, *Journal of Power Sources*, 2016, **324**, 150–157.
